# Supplementary material for: Local environmental context drives heterogeneity of early succession dynamics in alpine glacier forefields
Source: Copernicus journal article supplement (doi:10.5194/bg-20-1649-2023), 2023-04-27
Supplement: Supplementary file 1 [file bg-20-1649-2023-supplement.pdf]

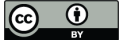

*Supplement of*

## **Local environmental context drives heterogeneity of early succession dynamics in alpine glacier forefields**

**Arthur Bayle et al.**

*Correspondence to:* Arthur Bayle ([arthur.bayle.env@gmail.com](mailto:arthur.bayle.env@gmail.com))

The copyright of individual parts of the supplement might differ from the article licence.

| Glacier Name                  | Year | Date         | Source                        | Resolution | Supplementary information                             |
|-------------------------------|------|--------------|-------------------------------|------------|-------------------------------------------------------|
| Glacier des Pèlerins (PEL)    | 1984 | 09/07/1984   | IGN                           | 50 cm      | C3428-0024_1984_IFN74_JRC_0596 *                      |
|                               | 2004 | 26/06/2004   | IGN                           | 50 cm      | CP04000702_2004_fd74_c_20000_0816 *                   |
|                               | 2009 | 13/08/2009   | Google Earth Pro              | < 1 m      | Image 2020 © Maxar Technologies                       |
|                               | 2018 | 27/09/2018   | SPOT 6/7                      | 1.5 m      | NA                                                    |
| Glacier du Tour (TR)          | 1984 | 09/07/1984   | IGN                           | 50 cm      | C3428-0024_1984_IFN74_JRC_0596 *                      |
|                               | 2004 | 26/06/2004   | IGN                           | 50 cm      | CP04000702_2004_fd74_c_20000_0816 *                   |
|                               | 2009 | 13/08/2009   | Google Earth Pro              | < 1 m      | Image 2020 © Maxar Technologies                       |
|                               | 2012 | 08/09/2012   | Google Earth Pro              | < 1 m      | Image 2020 © Maxar Technologies                       |
| Glacier Blanc (GB)            | 1986 | 05/09/1986   | IGN                           | 50 cm      | C3536-0041_1986_F3536-3636_0030 *                     |
|                               | 1994 | 03/08/1994   | IGN                           | 50 cm      | CN93000024_1993_IFN05_JRC_1173 *                      |
|                               | 2003 | 11/07/2003   | IGN                           | 50 cm      | CP03000082_2003_fd0038_250_c_0364 *                   |
|                               | 2013 | 08/09/2012   | IGN                           | 50 cm      | CP13000172_13FD0535 × 00010_01790 *                   |
| Glacier de Saint-Sorlin (STS) | 1986 | 06/09/1986   | IGN                           | 50 cm      | C3435-0011_1986_F3435-3635_0298 *                     |
|                               | 2003 | 15/07/2003   | IGN                           | 50 cm      | CP03000082_2003_fd0038_250_c_0418 *                   |
|                               | 2006 | 21/09/2006   | IGN                           | 50 cm      | CP06000192_FD0073x193_8863*                           |
|                               | 2016 | 04/10/2016   | IGN                           | 50 cm      | © BD ORTHO 2016                                       |
| Glacier de Gébroulaz (GEB)    | 1986 | 25/08/1986   | IGN                           | 50 cm      | C3534-0051_1986_F3534-3634_0044 *                     |
|                               | 2006 | 05/09/2006   | IGN                           | 50 cm      | CP06000192_FD0073x148_6605 *                          |
|                               | 2016 | 04/10/2016   | IGN                           | 50 cm      | © BD ORTHO 2016                                       |
|                               |      |              |                               |            |                                                       |
| Glacier du Lauson (LAU)       | 1975 | .../.../1975 | RAVA                          | 50 cm      | GeoSCT 2020 CTR – Flight CGR 1975                     |
|                               | 1999 | .../.../1999 | RAVA                          | 50 cm      | GeoSCT 2020 CTR – Flight CGR 1991 update CGR IT2000   |
|                               | 2005 | .../.../2005 | RAVA                          | 50 cm      | GeoSCT 2020                                           |
|                               | 2012 | .../.../2012 | RAVA                          | 20 cm      | GeoSCT 2020                                           |
|                               | 2019 | .../.../2019 | Google Earth Pro / Sentinel-2 | < 1 / 10 m | Image 2020 © Maxar Technologies / ESA 2020 Copernicus |
| Glacier du Lavassey (LAV)     | 1975 | .../.../1975 | FMS/ARPA                      | 50 cm      | GeoSCT 2020 CTR – Flight CGR 1975                     |
|                               | 1999 | .../.../1999 | FMS/ARPA                      | 50 cm      | GeoSCT 2020 CTR – Flight CGR 1991 update CGR IT2000   |
|                               | 2005 | .../.../2005 | FMS/ARPA                      | 50 cm      | GeoSCT 2020                                           |
|                               | 2012 | .../.../2012 | FMS/ARPA                      | 20 cm      | GeoSCT 2020                                           |
|                               | 2019 | .../.../2019 | Google Earth Pro / Sentinel-2 | < 1 / 10 m | Image 2020 © Maxar Technologies / ESA 2020 Copernicus |
| Glacier d'Orny (OR)           | 1975 | ---          | ---                           | ---        | ---                                                   |
|                               | 1999 | ---          | ---                           | ---        | ---                                                   |
|                               | 2005 | ---          | ---                           | ---        | ---                                                   |
|                               | 2012 | ---          | ---                           | ---        | ---                                                   |
|                               | 2019 | ---          | ---                           | ---        | ---                                                   |

\* : Mission ID from <https://remonterletemps.ign.fr/>

IGN : Institut national de l'information géographique et forestière <https://www.ign.fr/>

FMS : Fondazione Montagna Sicura <https://www.fondazionemontagnasicura.org>

**Table S1.** Detailed description of the sources used to improve the delineation of glacier outlines used in this study.

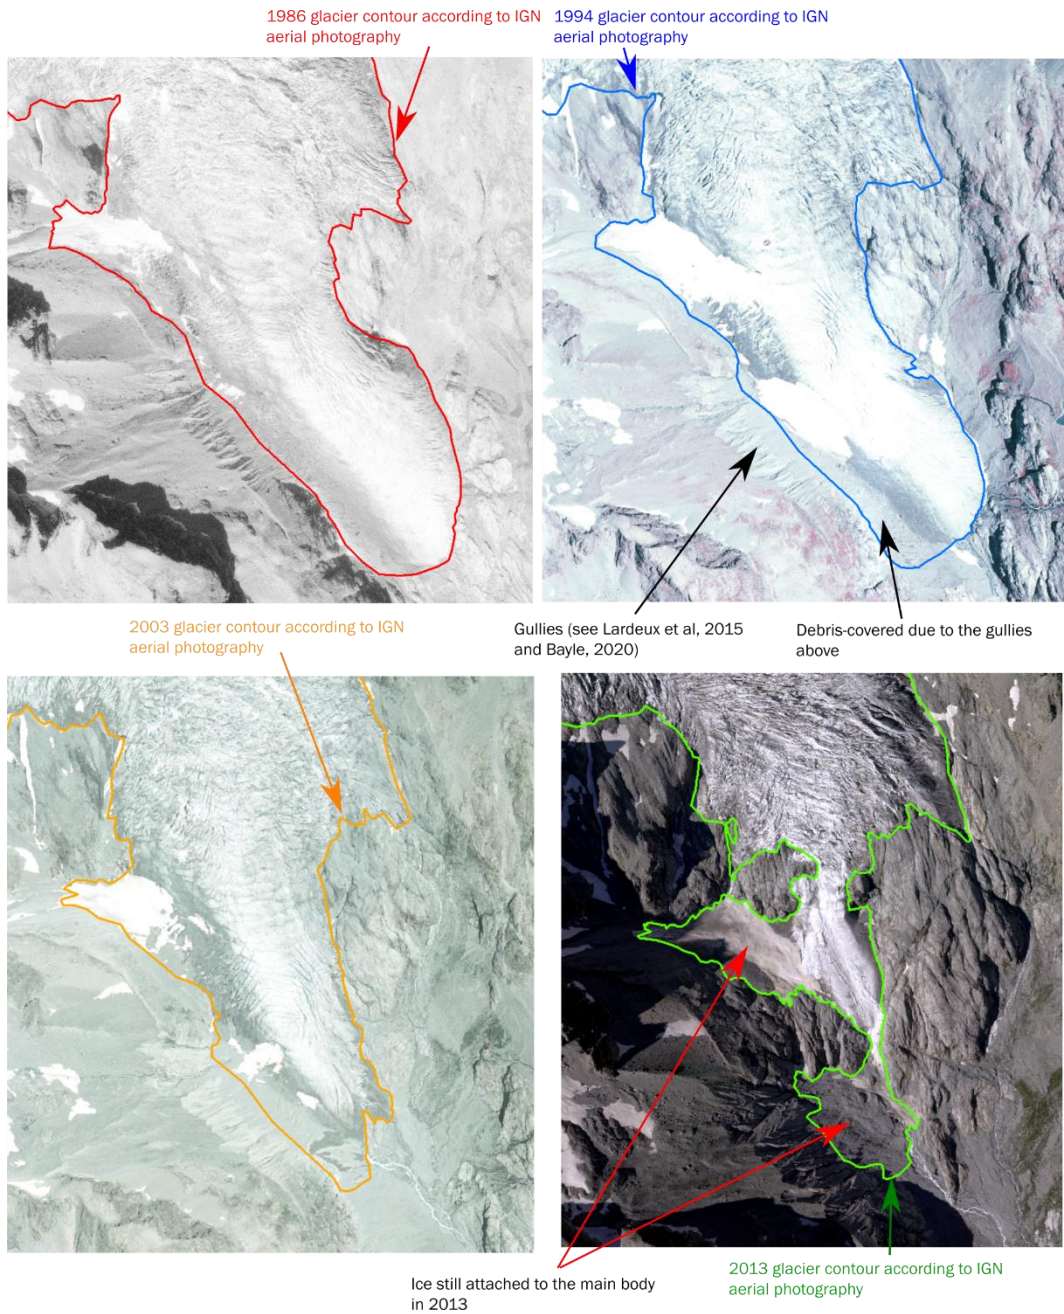

**Figure S1.** Detailed description of the Glacier Blanc (GB) glacier forefield. Background images © IGN

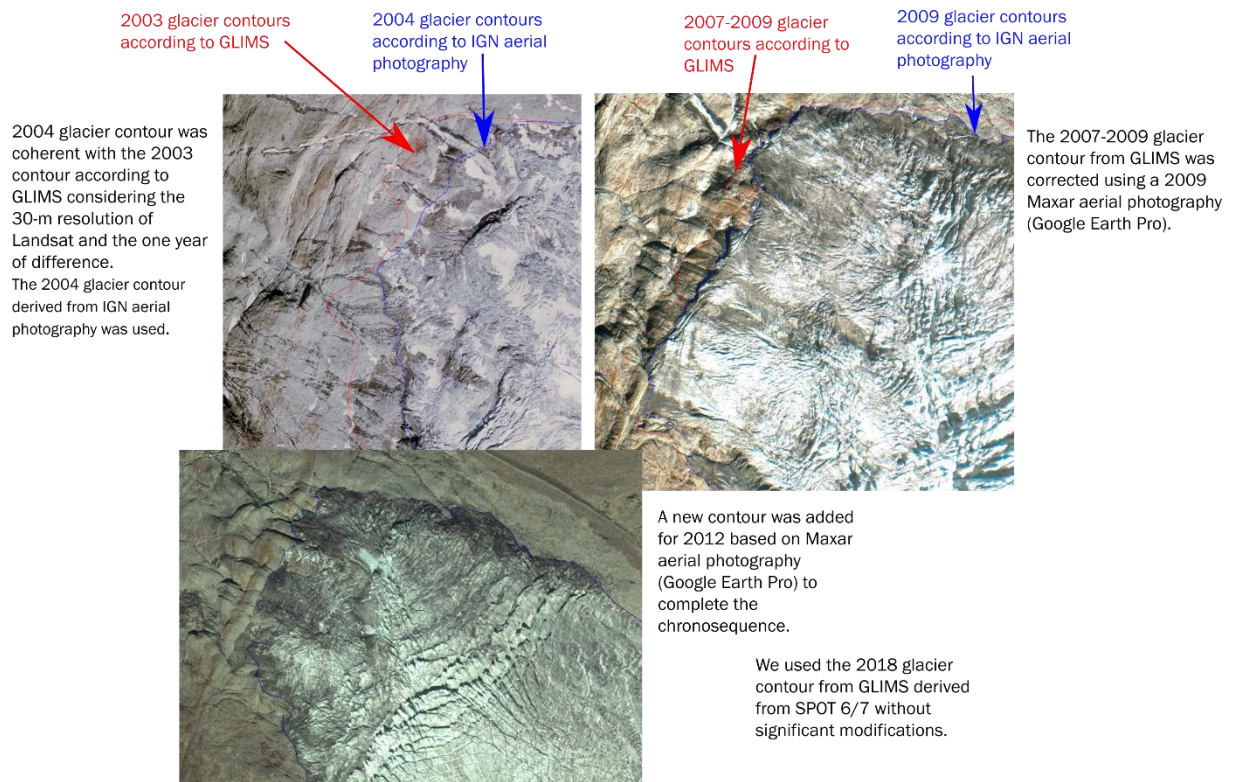

**Figure S2.** Detailed description of the Glacier du Tour (TR) glacier forefield. Background images © IGN

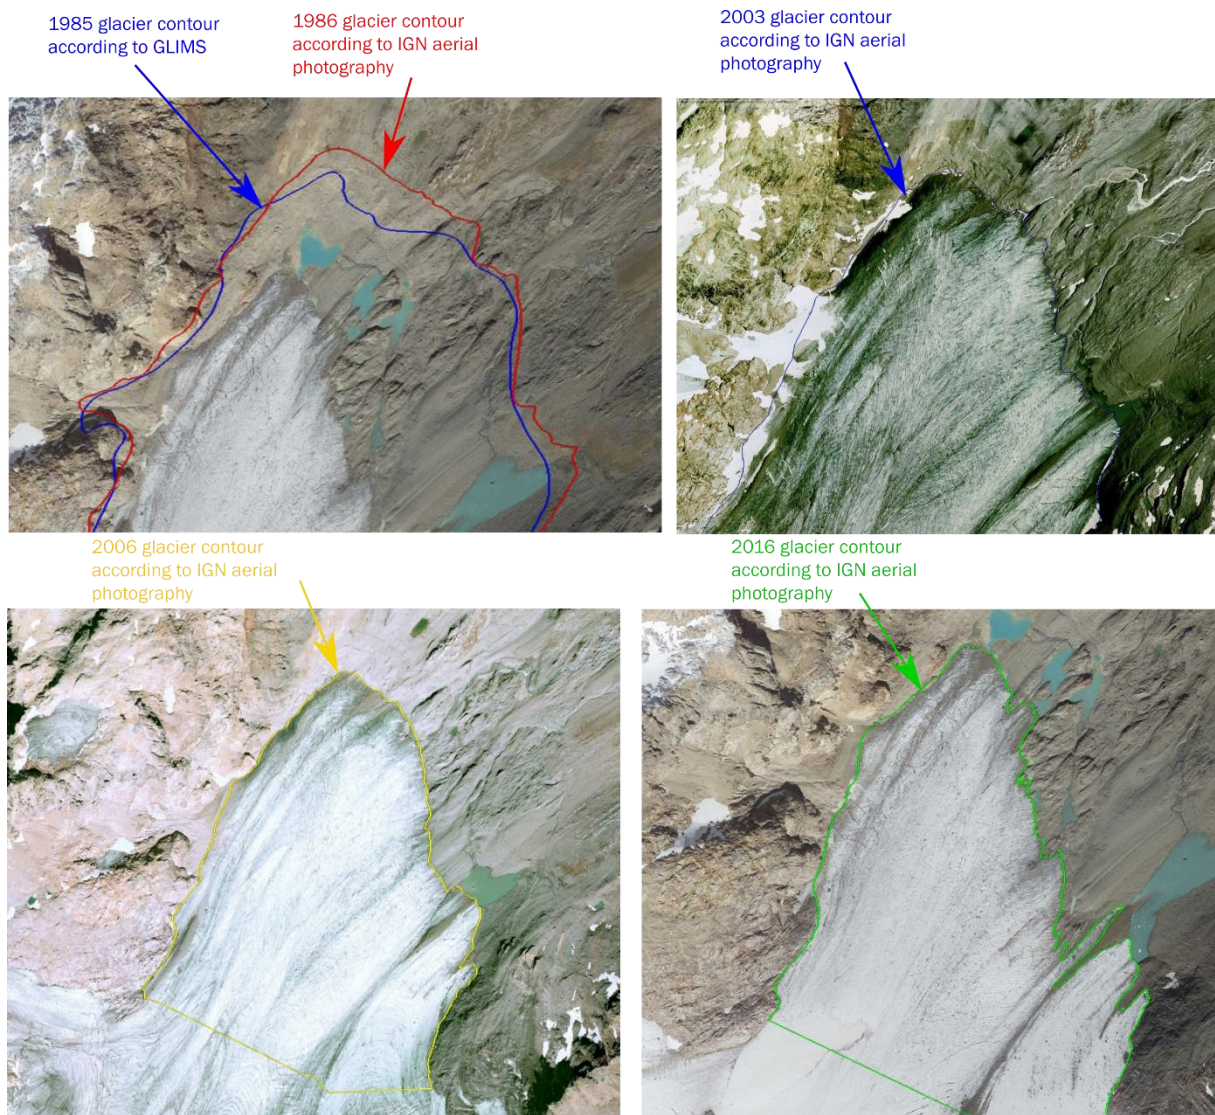

**Figure S3.** Detailed description of the Glacier de Saint-Sorlin (STS) glacier forefield. Background images © IGN

The 1986 contour was extracted based on the front moraine visible in recent photography (mid panel) and with the confirmation of an 1986 IGN aerial photography (left panel). The contour is concordant with GLIMS database.

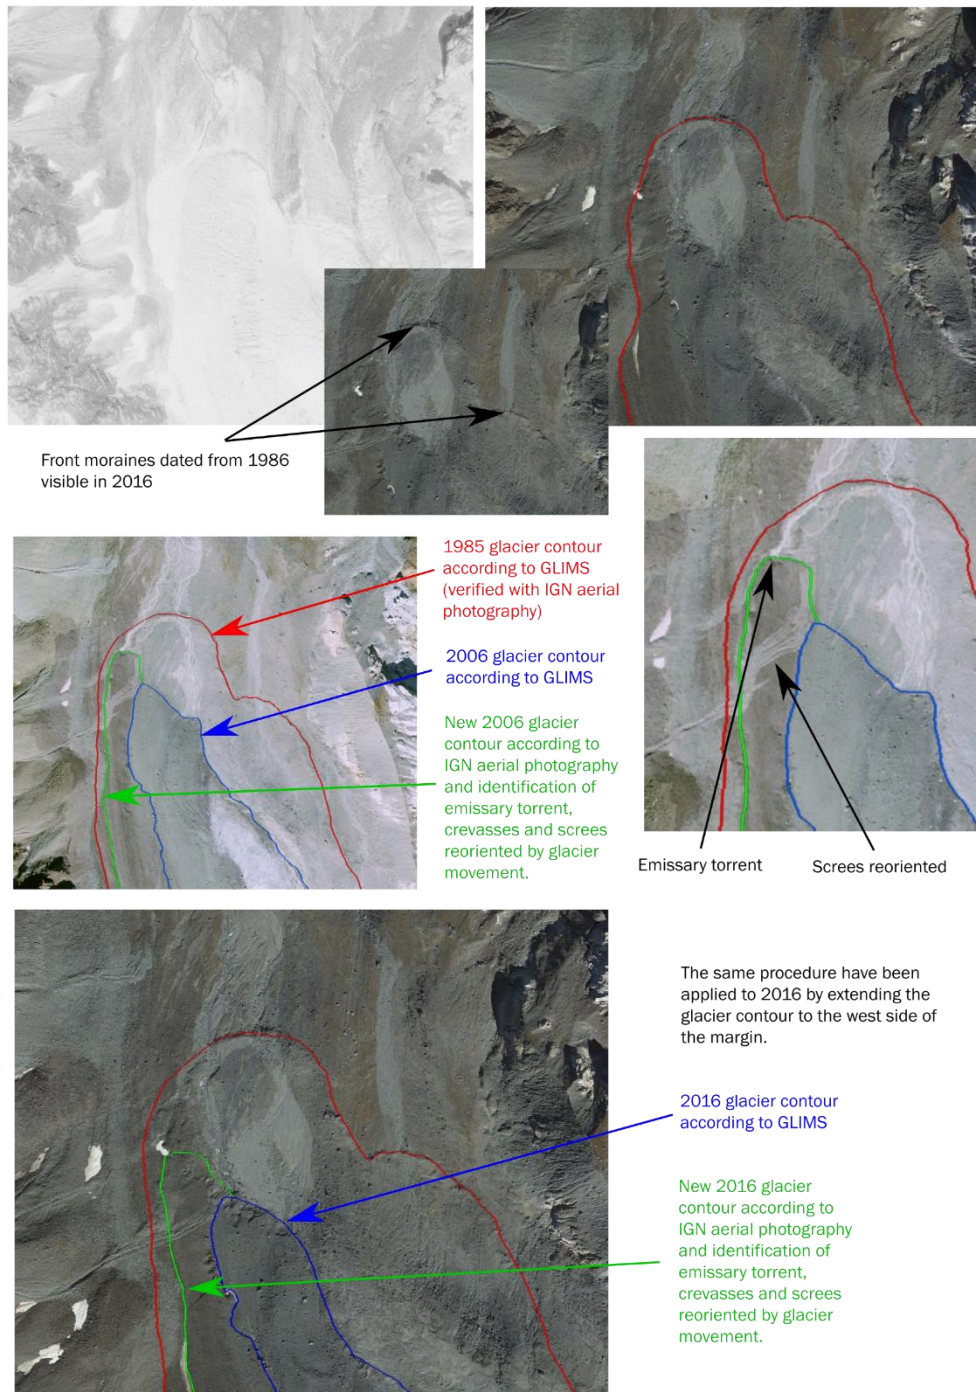

**Figure S4.** Detailed description of the Glacier de Gébroulaz (GEB) glacier forefield. Background images © IGN

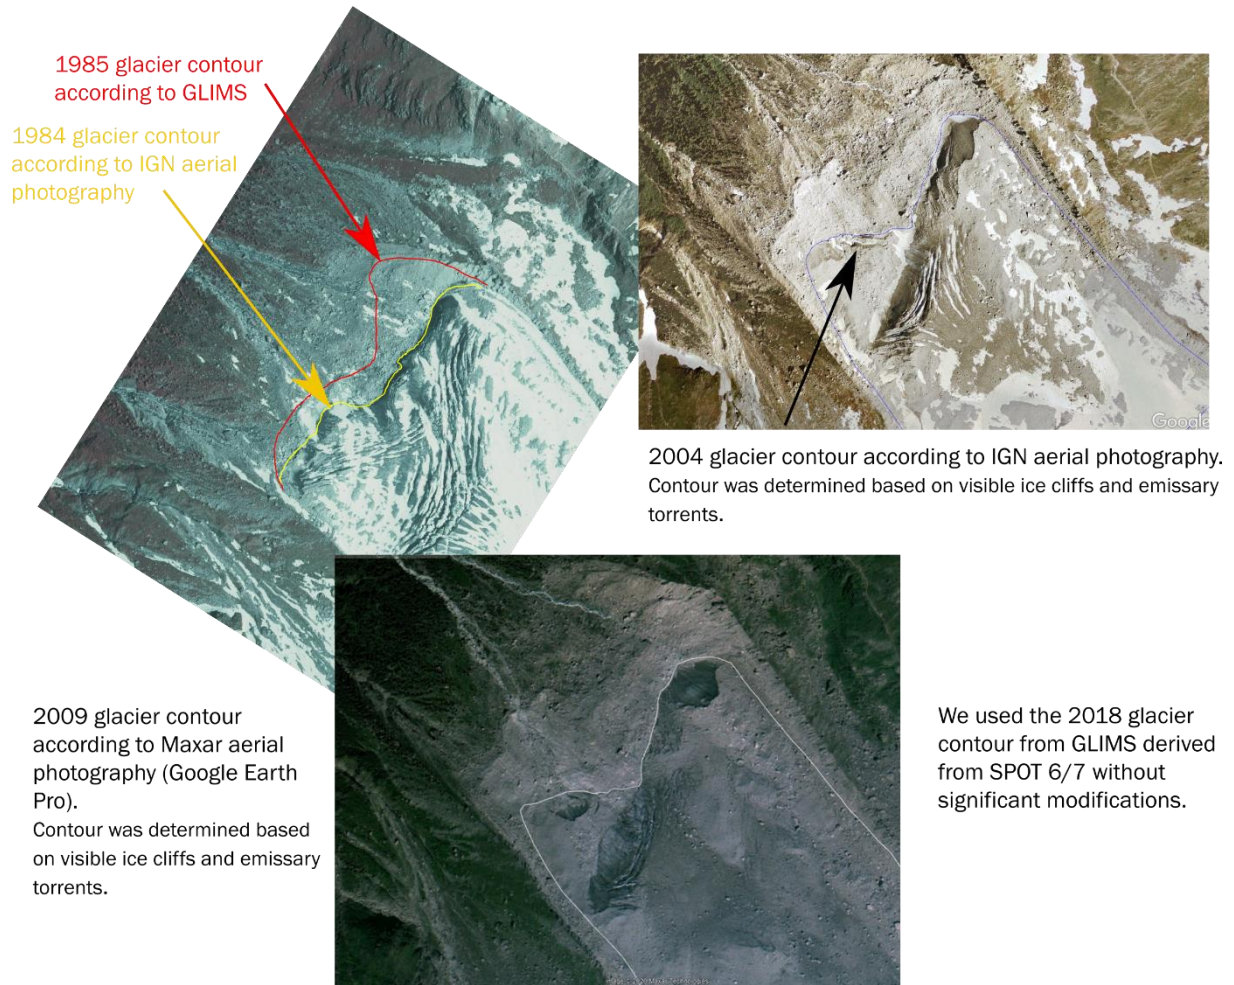

**Figure S5.** Detailed description of the Glacier des Pèlerins (PEL) glacier forefield. Background images © IGN

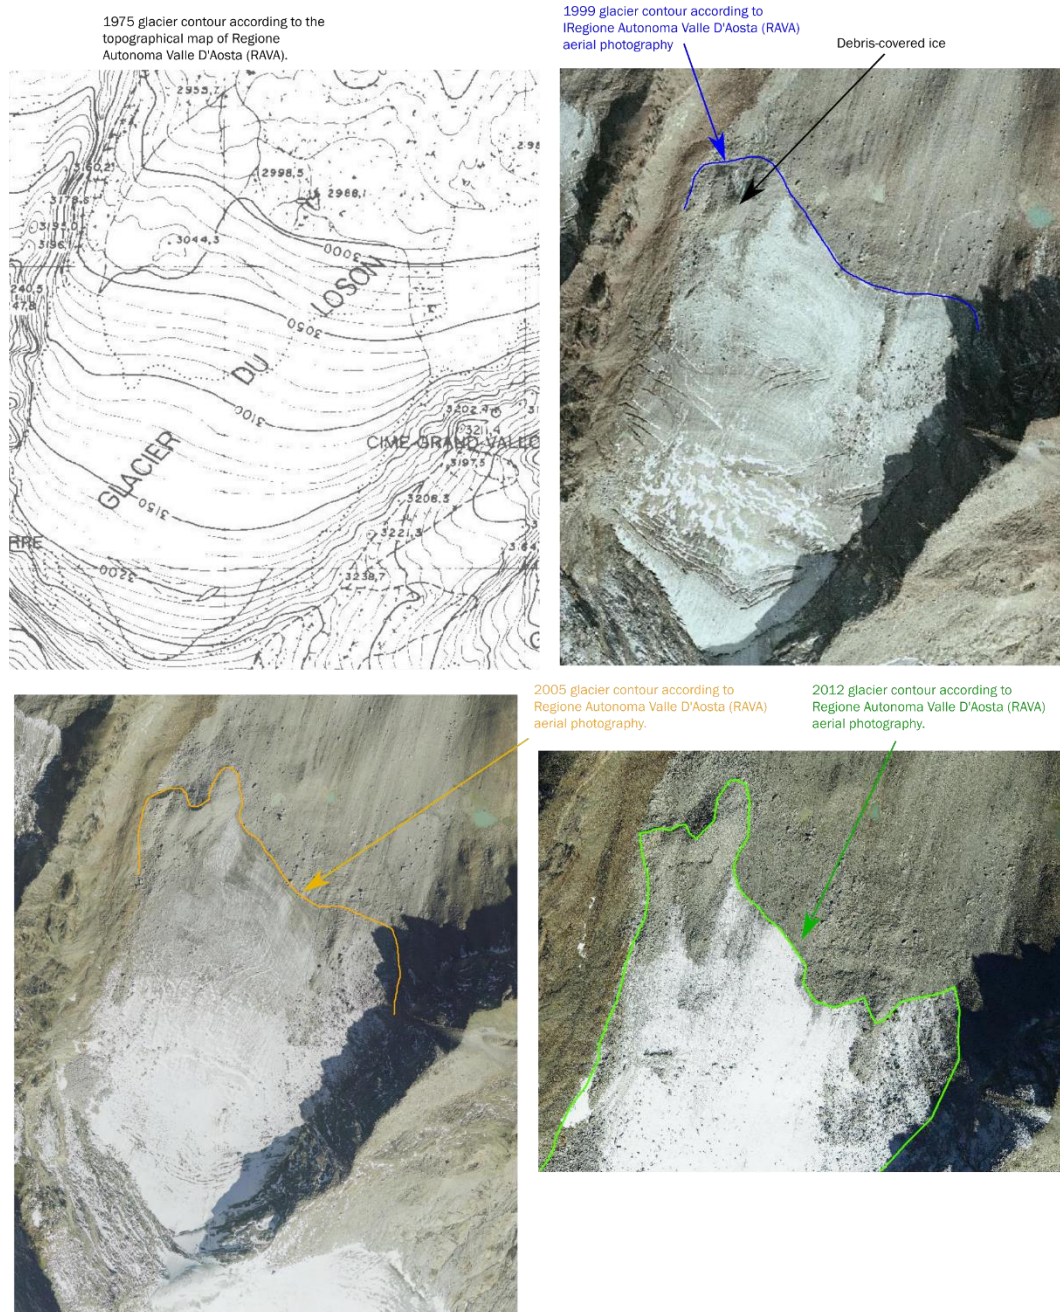

**Figure S6.** Detailed description of the Glacier du Lauson (LAU) glacier forefield. Background images © RTM



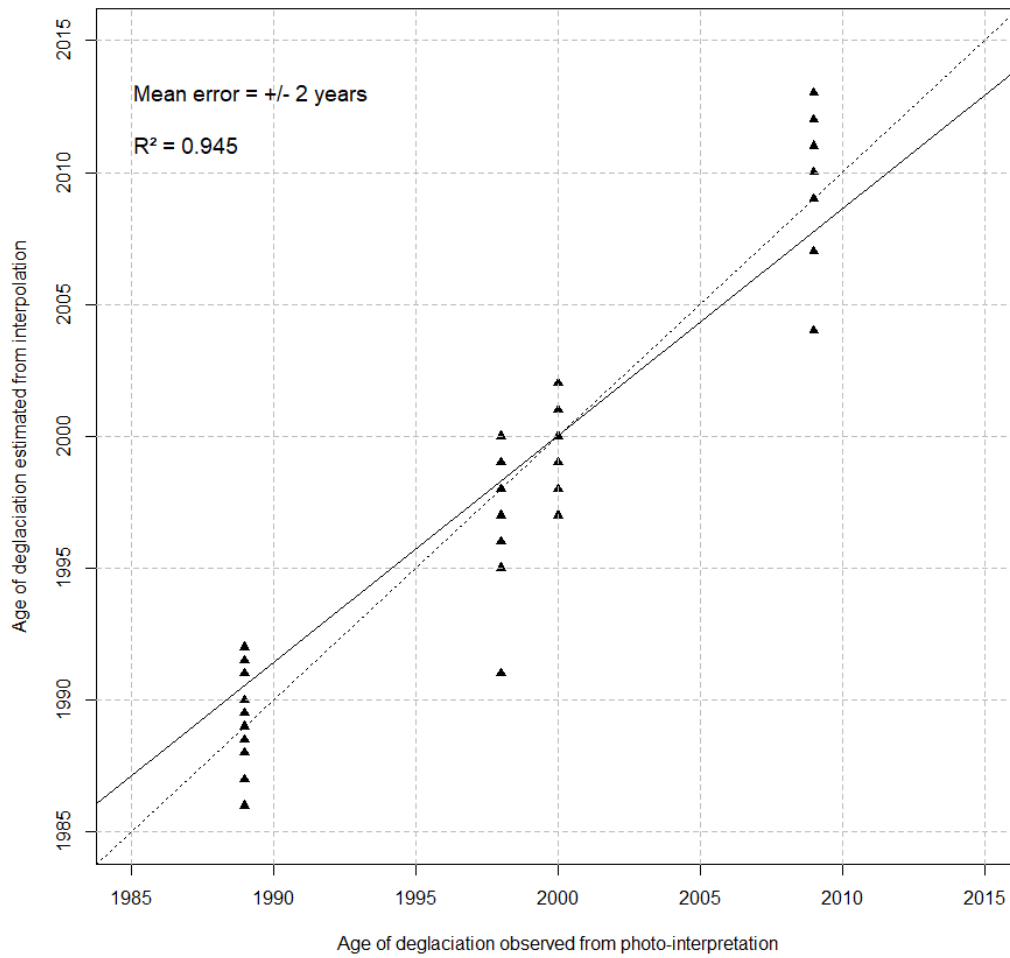

**Figure S7.** Validation of the “age of deglaciation” interpolation method using the chronosequence of deglaciation from Bayle (2020) composed of 4 sub-metric glacier outlines not used for the interpolation.

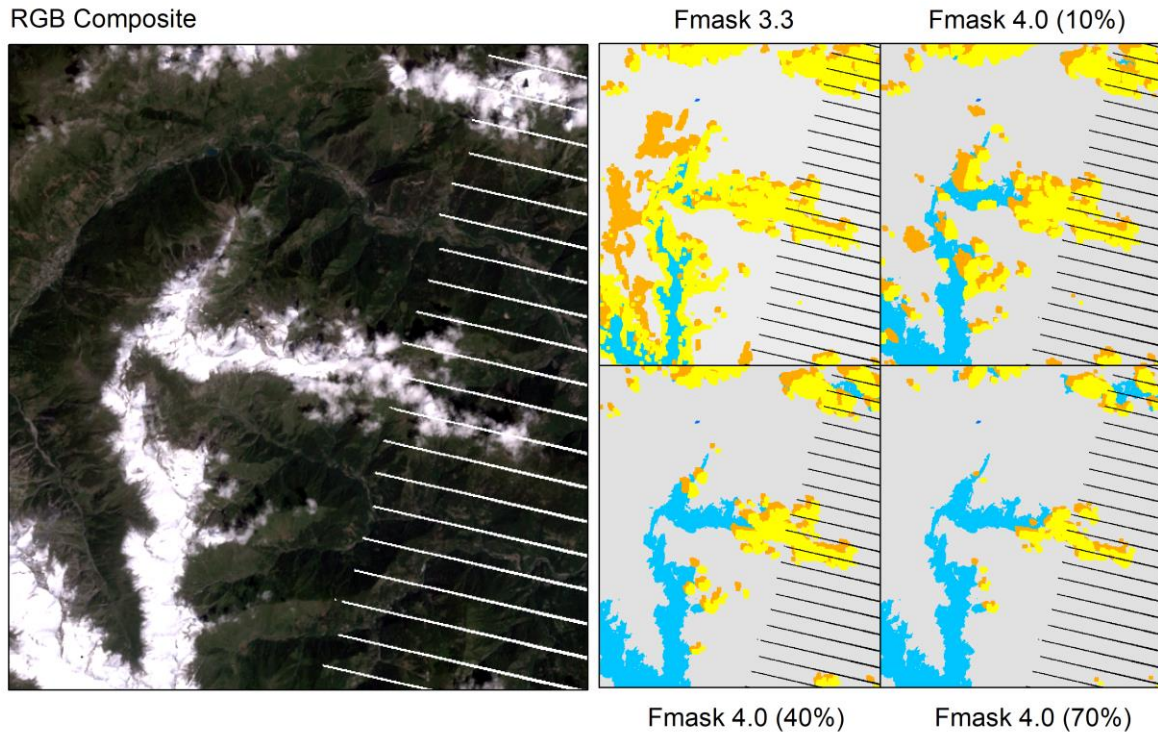

**Figure S8.** Comparison of cloud masks from Fmask 3.3, Fmask 4.0 with a cloud probability threshold of respectively 10, 40 and 70%. The scene is from Landsat 7 ETM+, Path 195 Row 029, captured the 16/07/2019.

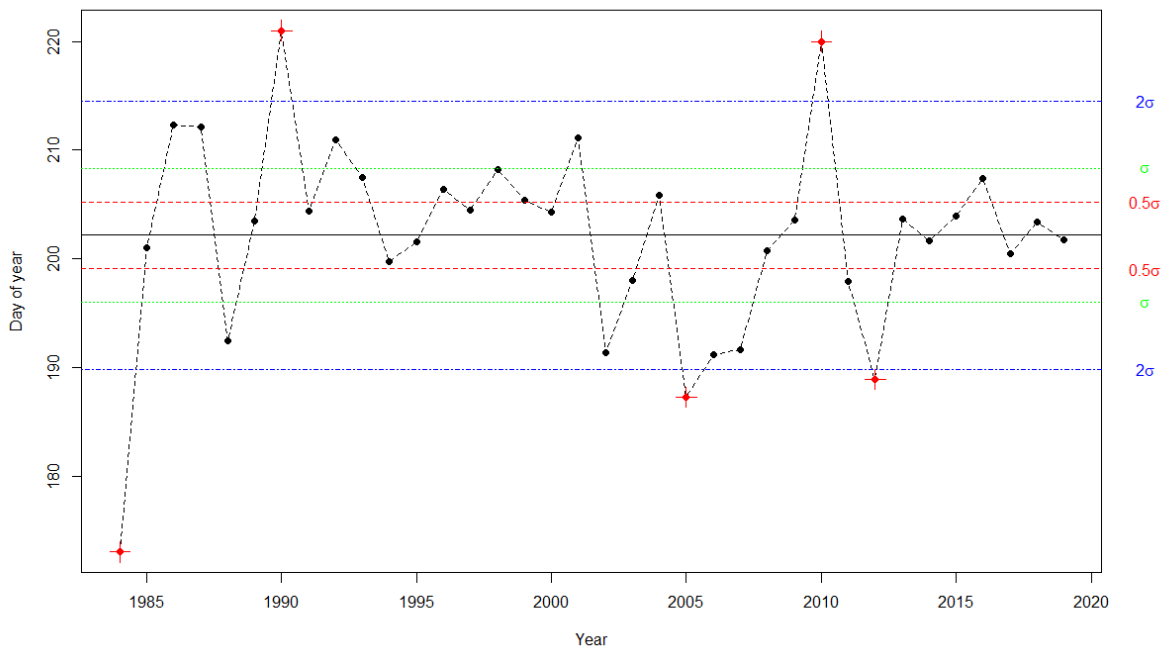

**Figure S9.** Mean day of year of retained summer dates over a random pixel for each year of the time series. Black horizontal lines indicate the mean over the entire time series. Colored dashed lines indicate degree of standard deviation. Red cross corresponds to discarded years according to criteria discussed in the text.
